# Supplementary material for: Timing Expression of miR203a-3p during OA Disease: Preliminary In Vitro Evidence
Source: MDPI journal article supplement (doi:10.3390/ijms24054316), 2023-02-21
Supplement: s1 [file s1]

Supplementary

S1

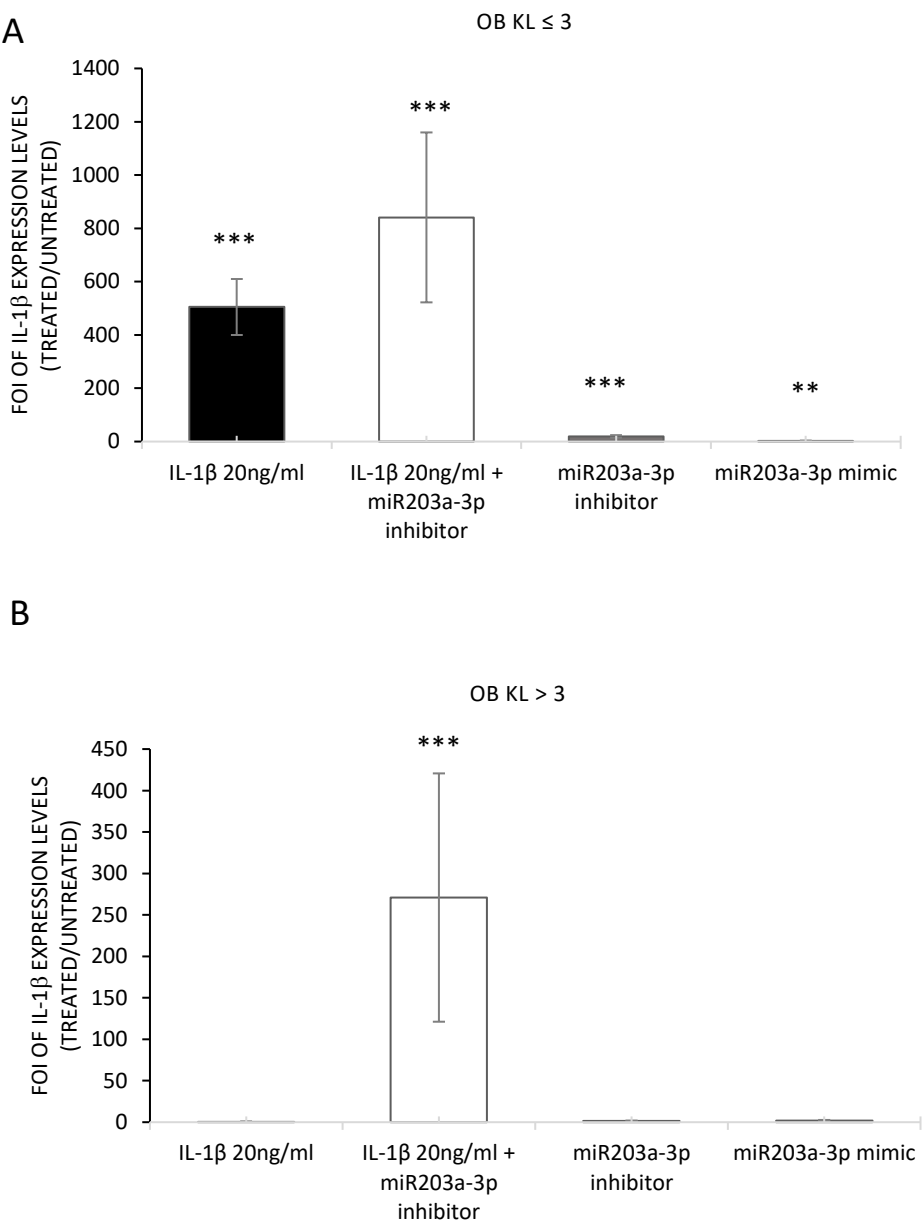

Figure S1. qRT-PCR analysis of IL-1β expression on OB derived by KL>3 group (A) and KL  $\leq 3$  group (B) treated :with IL-1β , after transfection with miR203a-3p inhibitor, after co-treatments IL-1β and miR203a-3p inhibitor. Data are reported as FOI of expression between treated and untreated samples. (Mean  $\pm$  SD, n=4). Student’s t- test: 1 symbol,  $p < 0.05$ ; 2 symbols,  $p < 0.005$ ; 3 symbols,  $p < 0.0005$ .

Supplementary

S2

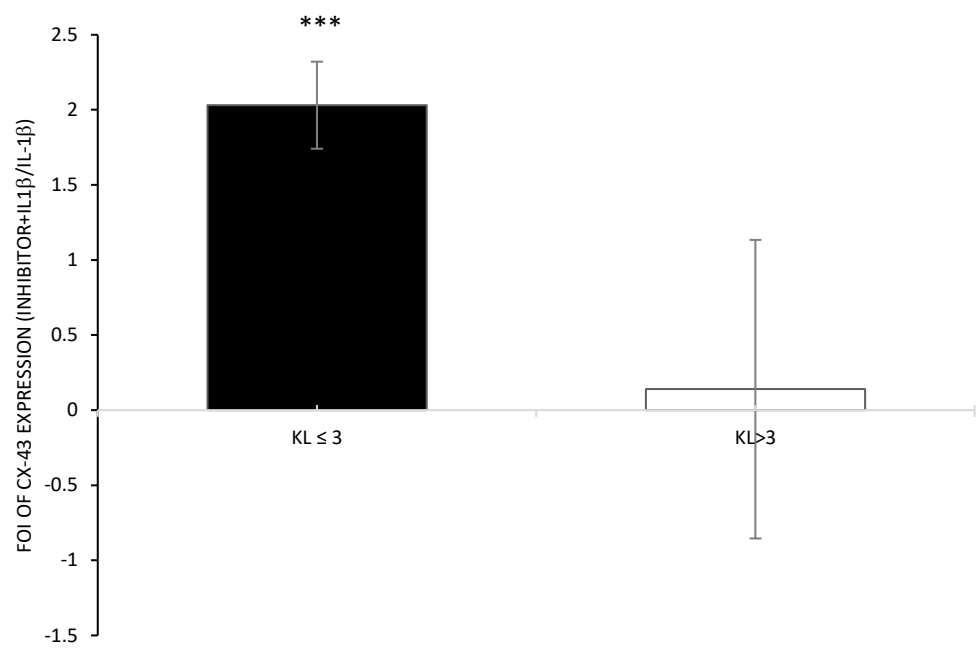

Figure S2. qRT-PCR analysis of CX-43 expression on OB derived by KL>3 group and KL ≤3 group treated with IL-1β, after transfection with miR203a-3p inhibitor, after co-treatments IL-1β and miR203a-3p inhibitor. Data are reported as FOI of expression between interleukin treated and inhibitor miR203a-3p transfected cells versus interleukin treated cells (Mean ± SD, n=4). Student's t- test: 1 symbol, p < 0.05; 2 symbols, p < 0.005; 3 symbols, p < 0.0005.

S3

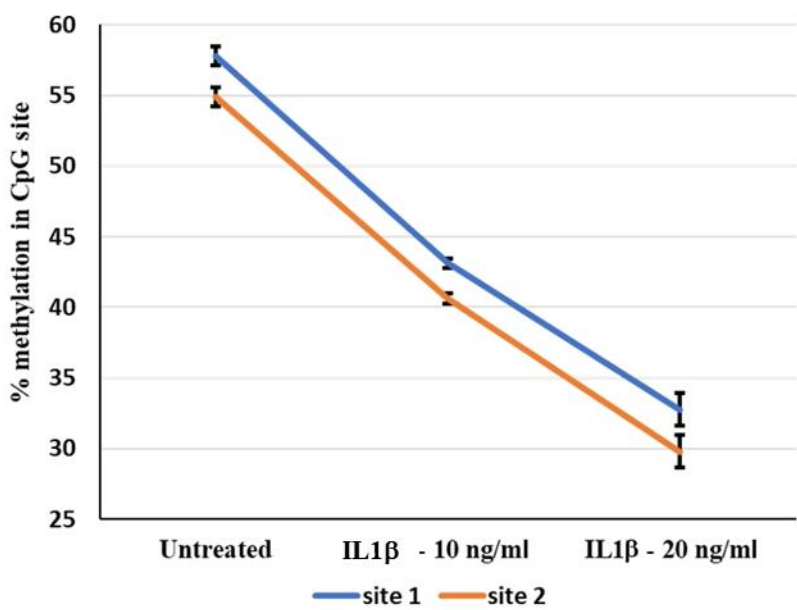

Figure S3: Percentage of methylation of two methyl-sensible restriction sites through MSRE-PCR analyses of IL-8 promoter of MSCs after 48 hrs under to the following treatments: Untreated; IL-1β (10 ng/ml); IL-1b (20 ng/ml); (Mean ± SD, n = 3, duplicates).
